# Supplementary material for: Microbial community structure and shift pattern of industry brine after a long-term static storage in closed tank
Source: PubMed Central journal article supplement (PMC9478951; doi:10.3389/fmicb.2022.975271), 2022-09-02
Supplement: Data_Sheet_1.pdf [file Data_Sheet_1.pdf]

## Supplementary materials

**Table S1.** Primers used in this study.

| Name     | Sequence (5'-3')       |
|----------|------------------------|
| F8       | TTGATCCTGCCGGAGGCCATTG |
| R1462    | ATCCAGCCGCAGATTCCCCTAC |
| 27F      | AGAGTTTGATCMTGGCT      |
| 1492R    | CGGTTACCTTGTTACGACTT   |
| 338F     | ACTCCTACGGGAGGCAGCA    |
| 806R     | GGACTACHVGGGTWTCTAAT   |
| Arch349F | GYGCASCAGKCGMGAAW      |
| Arch806R | GGACTACVSGGGTATCTAAT   |

**Table S2.** Total DNA isolated from the brines.

| <b>Sample</b>              | C1 <sup>a</sup> | C2 <sup>a</sup> | C3 <sup>a</sup> | C4 <sup>b</sup> | C5 <sup>b</sup> | ddH <sub>2</sub> O | Air         |
|----------------------------|-----------------|-----------------|-----------------|-----------------|-----------------|--------------------|-------------|
| <b>DNA amount<br/>(ng)</b> | 660.00          | 784.50          | 939.78          | 2975.28         | 1921.02         | 58.98/62.83        | 88.98/75.32 |
| <b>Mean±STDEV</b>          | 794.76±140.17   |                 | 2448.15±745.47  |                 | 60.91±2.72      | 82.15±9.66         |             |

Note: a, Brine collected in July, 2021; b, Brine collected in August, 2018.

**Table S3.** Species diversity of Archaea and Bacteria in brine uncovered by culture-dependent and culture-independent approaches.

| Method                                                    | Group                         | Sample          | ACE    | Chao1  | Simpson | Shannon | Coverage |
|-----------------------------------------------------------|-------------------------------|-----------------|--------|--------|---------|---------|----------|
| Culture-independent method                                | Species diversity of Archaea  | C1 <sup>a</sup> | 156.69 | 156.00 | 0.93    | 4.73    | 0.9999   |
|                                                           |                               | C2 <sup>a</sup> | 174.44 | 171.00 | 0.93    | 4.62    | 0.9997   |
|                                                           |                               | C3 <sup>a</sup> | 159.49 | 163.43 | 0.90    | 4.13    | 0.9997   |
|                                                           |                               | C4 <sup>b</sup> | 191.16 | 190.86 | 0.94    | 5.22    | 0.9998   |
|                                                           |                               | C5 <sup>b</sup> | 155.10 | 144.14 | 0.90    | 4.34    | 0.9997   |
|                                                           | Species diversity of Bacteria | C1 <sup>a</sup> | 474.65 | 478.63 | 0.93    | 5.58    | 0.9996   |
|                                                           |                               | C2 <sup>a</sup> | 441.33 | 447.69 | 0.96    | 5.83    | 0.9994   |
|                                                           |                               | C3 <sup>a</sup> | 425.10 | 427.06 | 0.95    | 5.74    | 0.9998   |
|                                                           |                               | C4 <sup>b</sup> | 313.56 | 325.95 | 0.91    | 4.27    | 0.9995   |
|                                                           |                               | C5 <sup>b</sup> | 251.75 | 259.50 | 0.65    | 2.39    | 0.9996   |
| Culture-dependent method and Species diversity of Archaea | in AS-168 medium              | C1 <sup>a</sup> | 131.69 | 107.00 | 0.83    | 3.26    | 0.9995   |
|                                                           |                               | C2 <sup>a</sup> | 187.00 | 186.93 | 0.22    | 1.24    | 0.9996   |
|                                                           |                               | C3 <sup>a</sup> | 206.61 | 213.00 | 0.50    | 2.28    | 0.9997   |
|                                                           |                               | C4 <sup>b</sup> | 152.50 | 156.63 | 0.40    | 1.56    | 0.9994   |
|                                                           |                               | C5 <sup>b</sup> | 137.49 | 138.40 | 0.51    | 1.36    | 0.9994   |
|                                                           | in NOM medium                 | C4 <sup>b</sup> | 130.51 | 128.46 | 0.84    | 3.31    | 0.9993   |
|                                                           |                               | C5 <sup>b</sup> | 264.62 | 270.00 | 0.79    | 4.59    | 0.9998   |

Note: a, Brine collected in July, 2021; b, Brine collected in August, 2018.

**Table S4.** The datasets generated and analyzed in the current study.

| Methods                                                               | Samples                                                                                                                                                               | BioProject IDs    | Links                                                                                                                                             |
|-----------------------------------------------------------------------|-----------------------------------------------------------------------------------------------------------------------------------------------------------------------|-------------------|---------------------------------------------------------------------------------------------------------------------------------------------------|
| The high-throughput DNA sequencing of bacteria from environmental DNA | C1 <sup>a</sup> , C2 <sup>a</sup> , C3 <sup>a</sup> , C4 <sup>b</sup> , C5 <sup>b</sup>                                                                               | PRJNA787045       | <a href="https://submit.ncbi.nlm.nih.gov/subs/sra/SUB10779502/overview">https://submit.ncbi.nlm.nih.gov/subs/sra/SUB10779502/overview</a>         |
|                                                                       | JSH                                                                                                                                                                   | PRJNA791781       | <a href="https://submit.ncbi.nlm.nih.gov/subs/sra/SUB10837144/overview">https://submit.ncbi.nlm.nih.gov/subs/sra/SUB10837144/overview</a>         |
| The high-throughput DNA sequencing of archaea from environmental DNA  | C1 <sup>a</sup> , C2 <sup>a</sup> , C3 <sup>a</sup> , C4 <sup>b</sup> , C5 <sup>b</sup>                                                                               | PRJNA787012       | <a href="https://submit.ncbi.nlm.nih.gov/subs/sra/SUB10721350/overview">https://submit.ncbi.nlm.nih.gov/subs/sra/SUB10721350/overview</a>         |
| The high-throughput DNA sequencing of archaea after cultivation       | C1 <sup>a</sup> , C2 <sup>a</sup> , C3 <sup>a</sup> , C4 <sup>b</sup> , C5 <sup>b</sup><br>(AS-168 medium) and<br>C4 <sup>b</sup> and C5 <sup>b</sup> (NOM<br>medium) | PRJNA787052       | <a href="https://submit.ncbi.nlm.nih.gov/subs/sra/SUB10779714/overview">https://submit.ncbi.nlm.nih.gov/subs/sra/SUB10779714/overview</a>         |
| The clone library of archaea from environmental DNA                   | C1 <sup>a</sup> , C2 <sup>a</sup> , C3 <sup>a</sup> , C4 <sup>b</sup> , C5 <sup>b</sup>                                                                               | OM184316-OM184500 | <a href="https://submit.ncbi.nlm.nih.gov/subs/genbank/SUB10907784/overview">https://submit.ncbi.nlm.nih.gov/subs/genbank/SUB10907784/overview</a> |
| Pure cultures isolated after cultivation by AS-168 and NOM medium     | C1 <sup>a</sup> , C2 <sup>a</sup> , C3 <sup>a</sup> , C4 <sup>b</sup> , C5 <sup>b</sup>                                                                               | OL979230-OL979291 | <a href="https://submit.ncbi.nlm.nih.gov/subs/genbank/SUB10837125/overview">https://submit.ncbi.nlm.nih.gov/subs/genbank/SUB10837125/overview</a> |

Note: a, Brine collected in July, 2021; b, Brine collected in August, 2018.

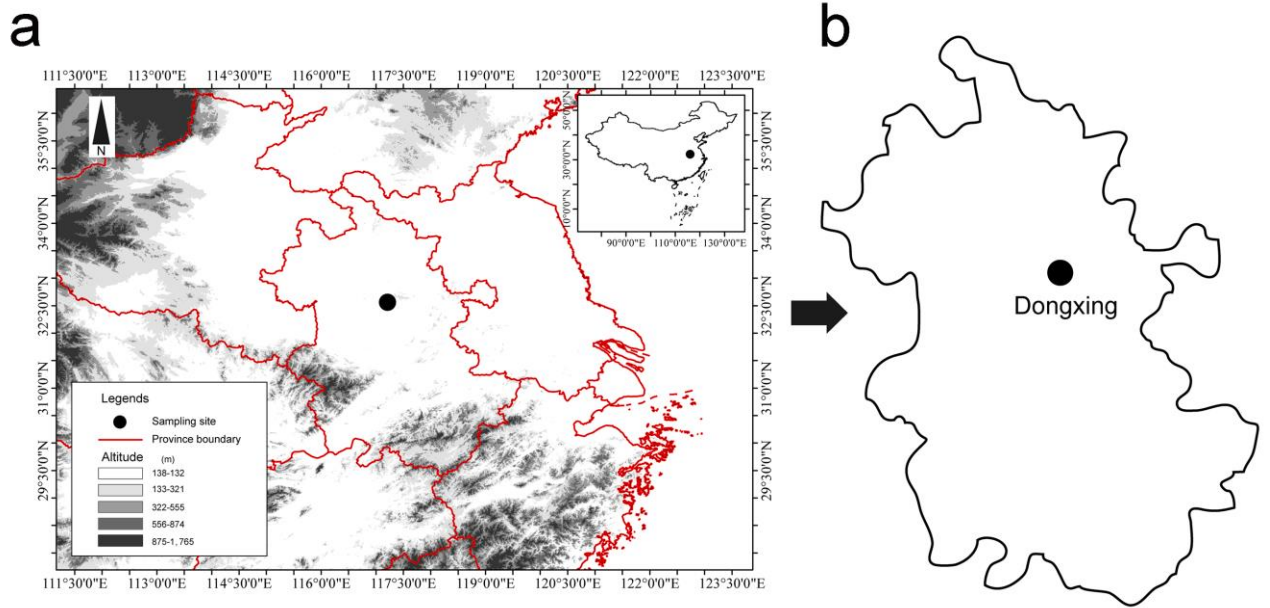

**Figure S1. Location of the sampling site.** (a) Geographic location of the sampling site (filled circle) was generated with ArcGIS 10.2 software (<https://desktop.arcgis.com/en/>). Different shades of gray shows different altitudes. Sampling site on the map of China is shown on the top right corner. Longitude (top and bottom) and latitude (left and right), and province boundary (red line) are also shown. Samples were collected from Dongxing Town, Dingyuan County, Anhui Province in the east of China. (b) The amplified map of the Anhui Province shows Dongxing Town where the samples were collected.

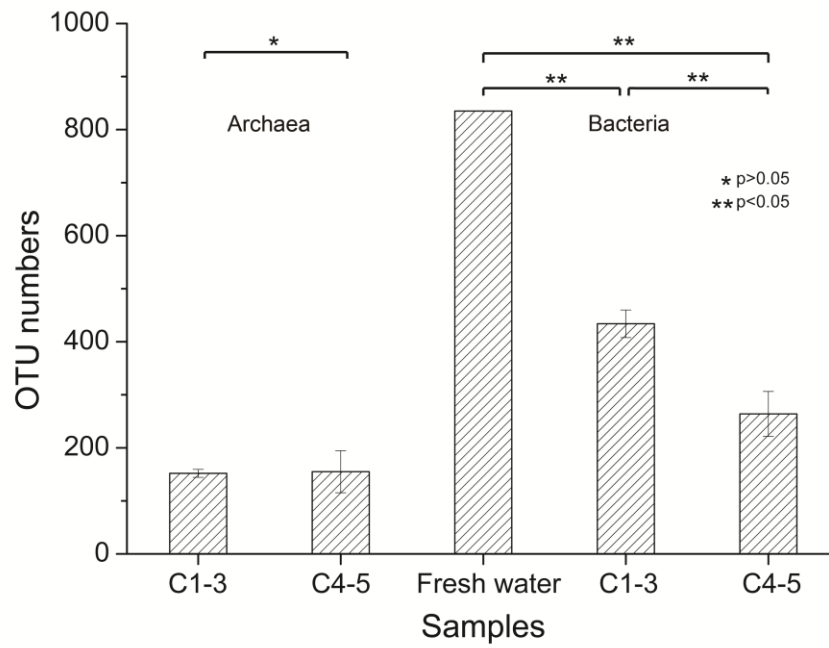

**Figure S2.** Comparison of archaeal and bacterial OTU numbers in brines collected in 2021 and 2018 through 16S rRNA amplicon sequencing. C1-3, three brine samples collected in 2021; C4-5, two brine samples collected in 2018; Fresh water, the natural water used for brine production.

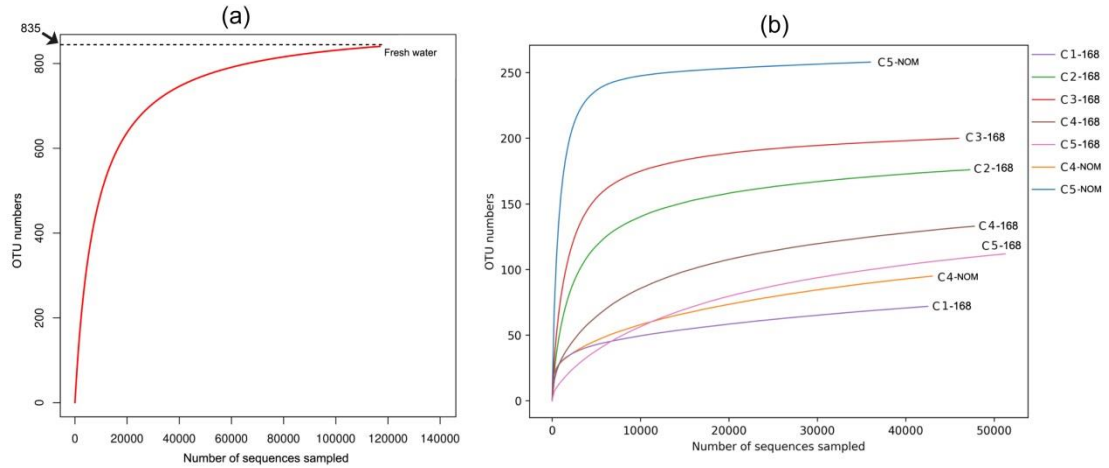

**Figure S3.** Rarefaction curve. Bacterial 16S RNA amplicon sequencing of the fresh water (a). Archaeal 16S RNA amplicon sequencing of cells grown on the AS-168 medium and NOM medium; C1-C3, brine samples collected in 2021; C4-C5, brine samples collected in 2018; Cx-168, culture-dependent approach was performed on AS-168 medium; Cx-NOM, culture-dependent approach was performed on NOM medium (b).

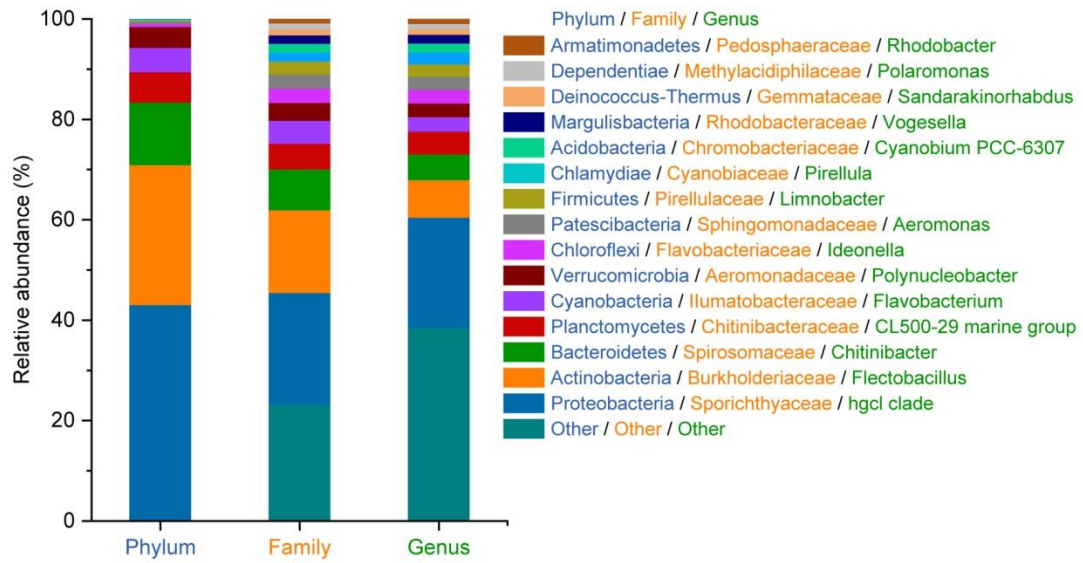

**Figure S4.** Community composition of bacteria in fresh water at the phylum (blue), family (orange) and genus (green) level.
